# Supplementary material for: Transient appearance of circulating tumor DNA associated with de novo treatment
Source: PubMed Central journal article supplement (PMC5146655; doi:10.1038/srep38639), 2016-12-09
Supplement: srep38639-s1.pdf [file srep38639-s1.pdf]

## Supplementary Information

### Transient appearance of circulating tumor DNA associated with *de novo* treatment

Kikuya Kato<sup>1</sup>, Junji Uchida<sup>2</sup>, Yoji Kukita<sup>1</sup>, Toru Kumagai<sup>2</sup>, Kazumi Nishino<sup>2</sup>,  
Takako Inoue<sup>2</sup>, Madoka Kimura<sup>2</sup>, and Fumio Imamura<sup>2</sup>

<sup>1</sup>Department of Molecular and Medical Genetics, Research Institute, Osaka  
Medical Center for Cancer and Cardiovascular Diseases, Osaka, Japan

<sup>2</sup>Department of Thoracic Oncology, Osaka Medical Center for Cancer and  
Cardiovascular Diseases, Osaka, Japan

**a**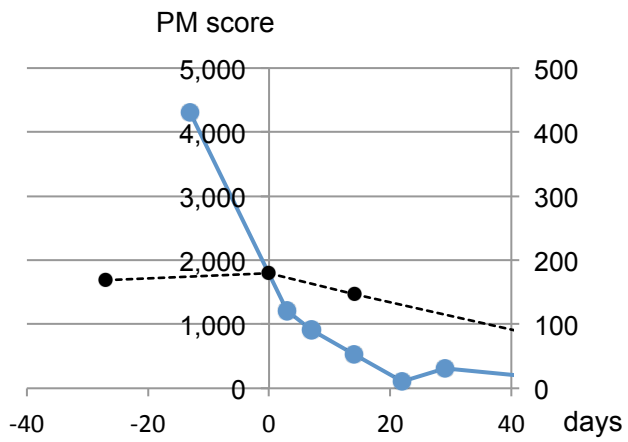**b**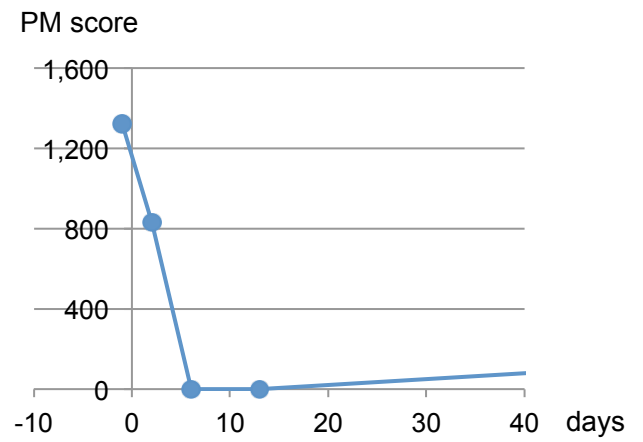**c**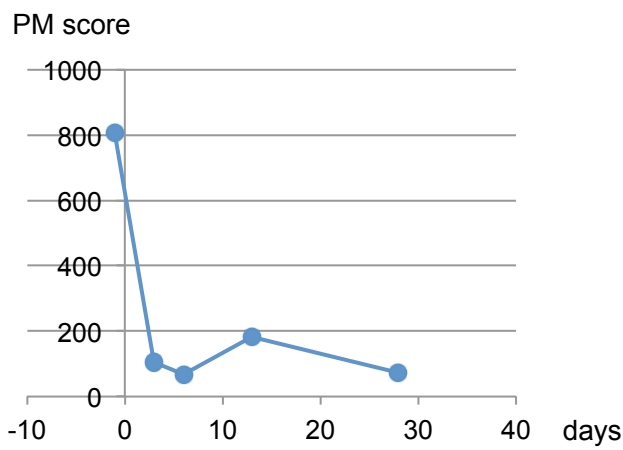**d**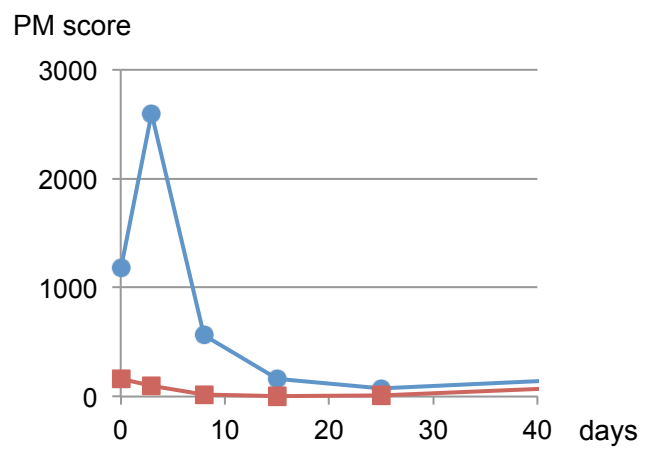**e**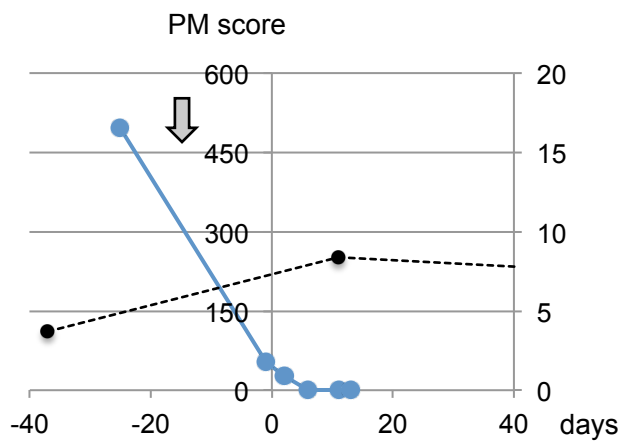**f**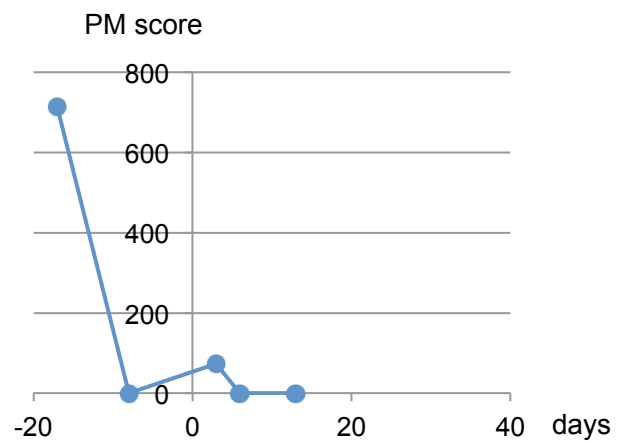

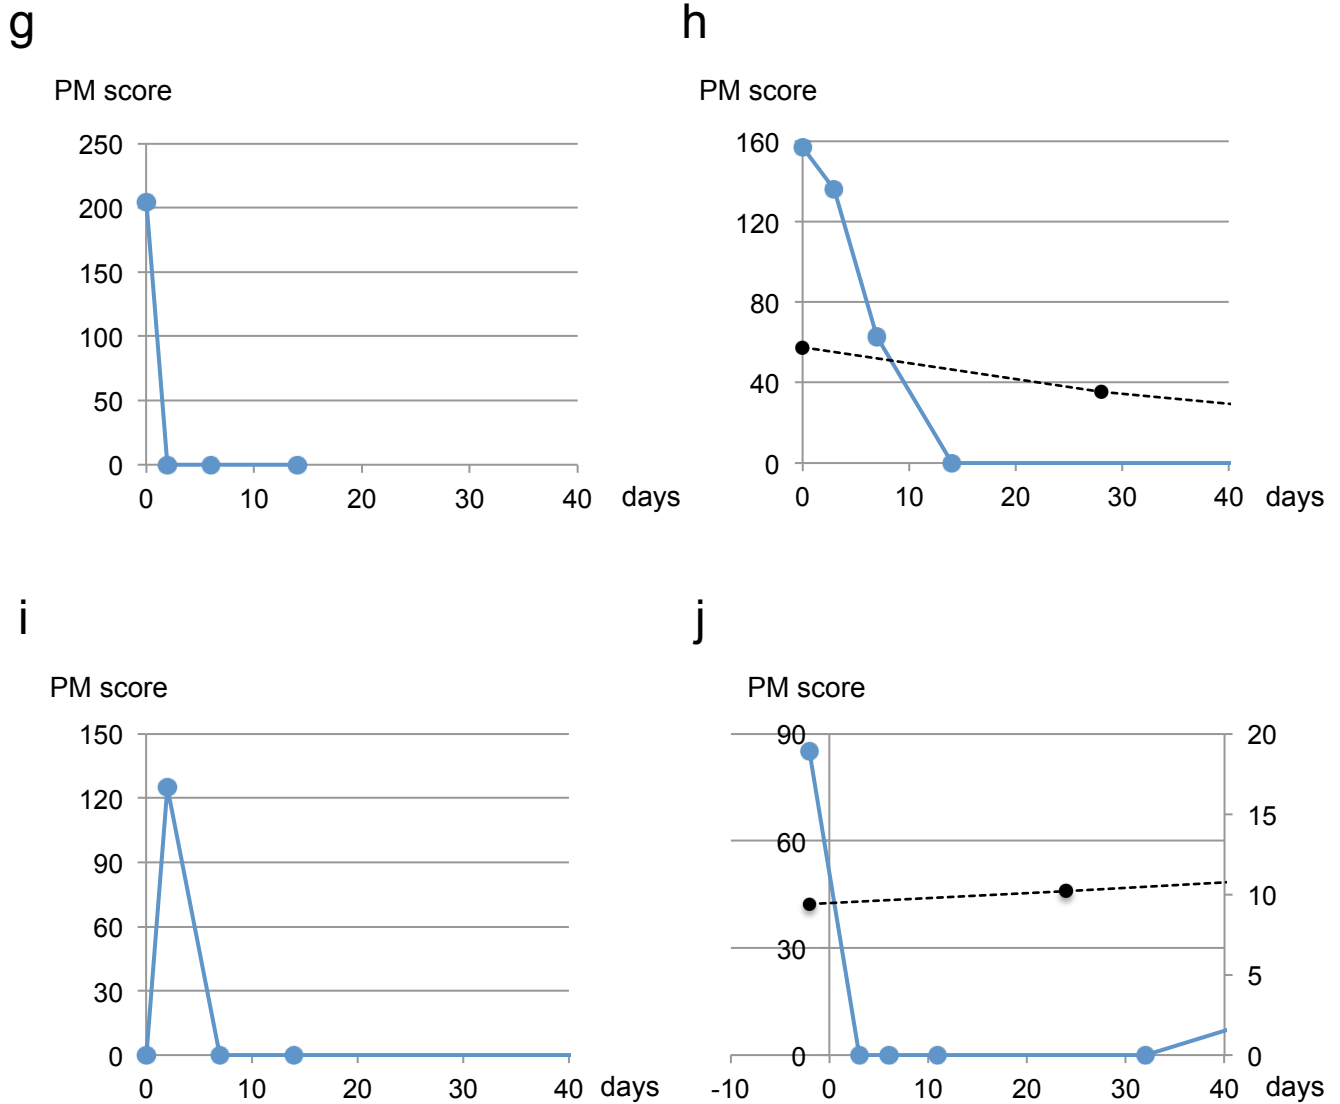

Supplementary Figure S1. ctDNA dynamics in the early period of the EGFR-TKI treatment. These patients are not represented in Figure 1. a. Patient E9; b. Patient E10; c. Patient E11; d. Patient E12; e. Patient E13; f. Patient E14; g. Patient E15; h. Patient E16; i. Patient E17; j. Patient E18. The details of the panels are the same as those in Figures 1 and 2.

Supplementary Table S1. Clinical information of patients included in the first data set.

| Patient_ID | Age | Sex | Stage | EGFR-TKI             | Initial response | Activating mutation | Therapies before EGFR-TKI           |
|------------|-----|-----|-------|----------------------|------------------|---------------------|-------------------------------------|
| E1         | 81  | F   | IV    | Erlotinib            | PR               | L858R               | Radiation                           |
| E2         | 54  | F   | IV    | Gefitinib            | PR               | L858R               | None                                |
| E3         | 69  | M   | IV    | Gefitinib            | PR               | Exon 19 deletion    | Radiation (bone), CBDCA+PTX +AMG706 |
| E4         | 56  | F   | IIA   | Gefitinib            | NE               | Exon 19 deletion    | Curative surgery, CDDP+VNR          |
| E5         | 65  | F   | IV    | Gefitinib            | PR               | Exon 19 deletion    | Radiation (brain)                   |
| E6         | 67  | M   | IV    | Gefitinib            | PR               | L858R               | None                                |
| E7         | 76  | F   | IV    | Gefitinib            | SD               | L858R               | None                                |
| E8         | 68  | F   | IIIB  | Erlotinib            | SD               | Exon 19 deletion    | CBDCA+PTX, Radiation                |
| E9         | 86  | F   | IV    | Gefitinib            | PR               | Exon 19 deletion    | None                                |
| E10        | 68  | F   | IV    | Gefitinib            | PR               | Exon 19 deletion    | None                                |
| E11        | 62  | F   | IV    | Erlotinib            | PR               | L858R               | None                                |
| E12        | 75  | F   | IIIA  | Erlotinib            | PR               | L858R               | Radiation (brain)                   |
| E13        | 66  | M   | IV    | Erlotinib            | NE               | Exon 19 deletion    | Radiation (bone)                    |
| E14        | 65  | F   | IV    | Erlotinib->gefitinib | PR               | L858R               | None                                |
| E15        | 77  | F   | IB    | Gefitinib            | NE               | L858R               | Surgery                             |
| E16        | 58  | F   | IV    | Erlotinib            | NE               | L858R               | Radiation (bone)                    |
| E17        | 74  | F   | IIIA  | Gefitinib            | PR               | L858R               | CDDP+VNR, Radiation                 |
| E18        | 79  | F   | IV    | Gefitinib            | SD               | L858R               | none                                |
| E19        | 77  | F   | IV    | Gefitinib            | PR               | L858R               | Surgery, Radiation                  |
| E20        | 65  | M   | IV    | Gefitinib            | SD               | L858R               | Surgery, Radiation                  |
| E21        | 65  | M   | IV    | Erlotinib->gefitinib | PR               | Exon 19 deletion    | Radiation                           |

Patients E19-21 did not have any ctDNA-positive samples.

Abbreviations are as follows: PTX, paclitaxel; VNR, vinorelbine.
